# Supplementary material for: Implementation and Operational Research: An Integrated and Comprehensive Service Delivery Model to Improve Pediatric and Maternal HIV Care in Rural Africa
Source: PubMed Central journal article supplement — J Acquir Immune Defic Syndr. 2016 Nov 14;73(5):e67–75. doi: 10.1097/QAI.0000000000001178 (PMC5172808; doi:10.1097/qai.0000000000001178), 2016-11-14
Supplement: qai-73-e67-s001.pdf [file qai-73-e67-s001.pdf]

**Table, Supplemental Digital Content 1.** Measures implemented to improve the care of HIV-infected pregnant women, children and their families

| <b>Year</b> | <b>Month</b>           | <b>Implemented measure to improve the clinical care of pregnant women and children living with HIV and their families</b>                                                                                                                                      |
|-------------|------------------------|----------------------------------------------------------------------------------------------------------------------------------------------------------------------------------------------------------------------------------------------------------------|
| <b>2012</b> | <b>December</b>        | Introduction of new report forms to systematically and comprehensively collect clinical, drug and laboratory information                                                                                                                                       |
| <b>2013</b> | <b>January</b>         | Implementation of a standardized follow-up for HIV-exposed infants                                                                                                                                                                                             |
|             | <b>January - March</b> | Creation of a PMTCT and Pediatric HIV clinical team                                                                                                                                                                                                            |
|             | <b>April</b>           | Integration of PMTCT and HIV services for children and their families within the Reproductive and Child Health Clinic. Inauguration of the One Stop Clinic: antenatal, immunization, under-five and HIV services are offered the same day under the same roof. |
|             | <b>May</b>             | Launch of the electronic data collection system OpenMRS: the clinic becomes paperless                                                                                                                                                                          |
| <b>2014</b> | <b>January</b>         | Provider Initiated Testing and Counseling is implemented in the inpatient wards of the St Francis Referral Hospital                                                                                                                                            |
|             | <b>March</b>           | Pro-viral HIV DNA PCR for Early Infant Diagnosis is established at the Ifakara Health Institute laboratory                                                                                                                                                     |
|             | <b>April</b>           | Implementation of PMTCT Option B+ guidelines in Ifakara                                                                                                                                                                                                        |
|             | <b>July</b>            | A professional counselor joins the One Stop Clinic to coordinate all counseling activities including pre- and post-test, adherence, and disclosing sessions to HIV-infected children and adolescents, among others                                             |

PMTCT: Prevention of Mother-To-Child Transmission

**Figure, Supplemental Digital Content 2.** Early mother-to-child transmission rate among HIV-exposed infants enrolled during 2013-2014

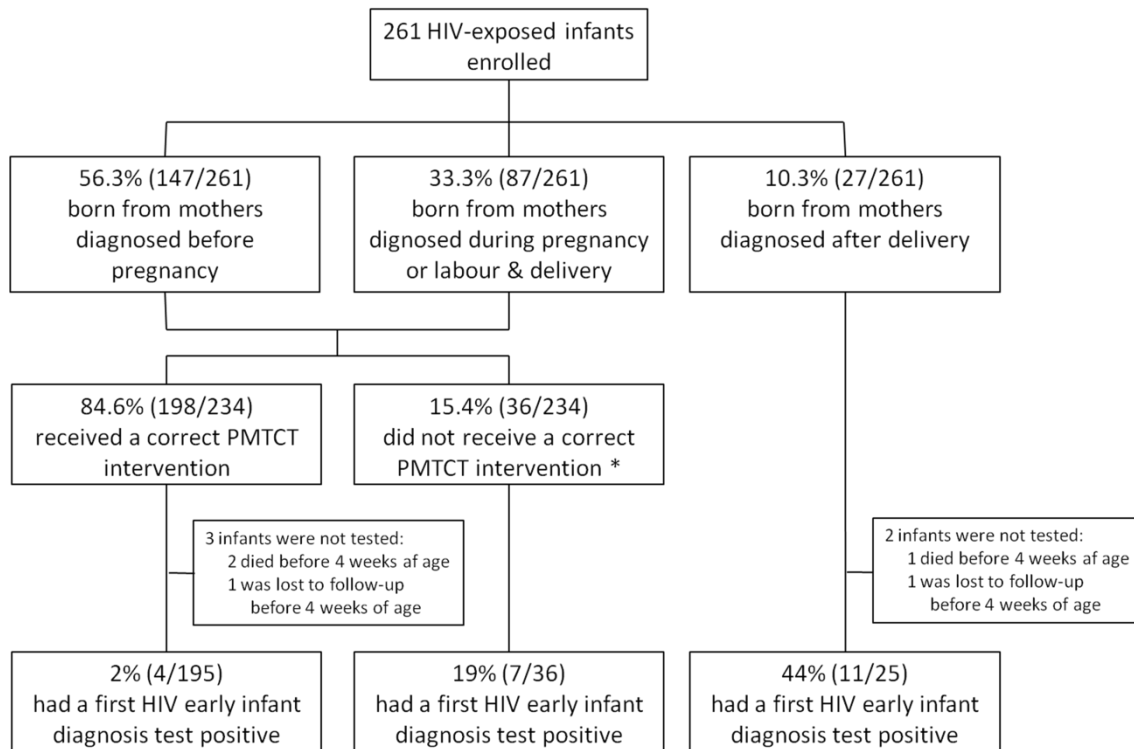

\*All the mothers in this group were attended before the HIV care and treatment services were integrated within the Reproductive and Child Health Clinic

PMTCT: Prevention of Mother-To-Child Transmission
